# Supplementary material for: Optomotor steering and flight control requires a specific sub-section of the compound eye in the hawkmoth,Manduca sexta
Source: Oxford University Press journal article supplement (doi:10.1242/jeb.178210), 2018-01-01
Supplement: jeb178210supp.pdf [file jeb178210supp.pdf]

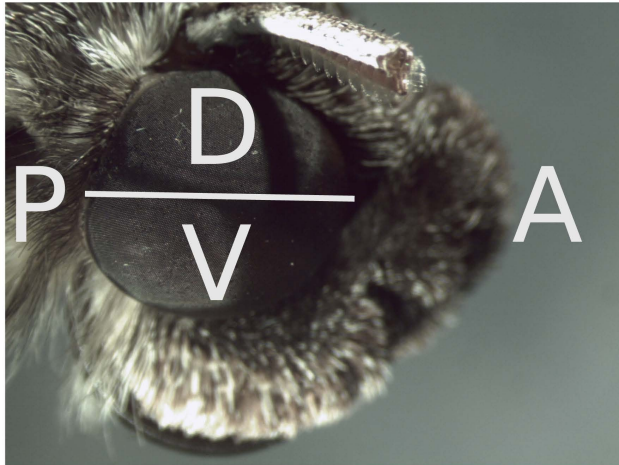

Control

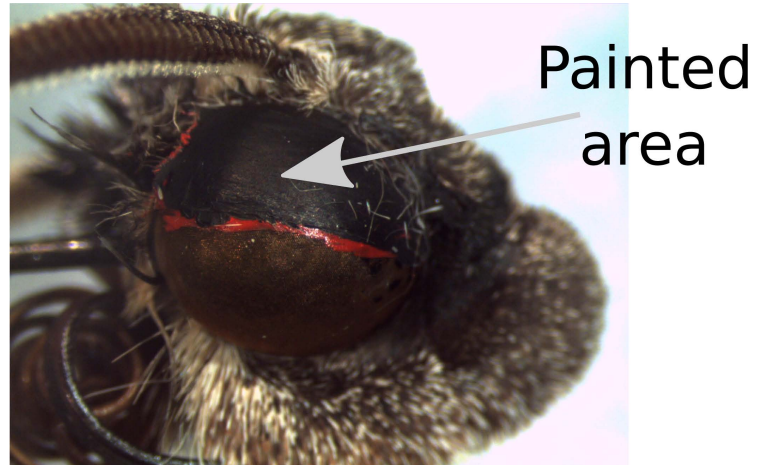

Dorsal

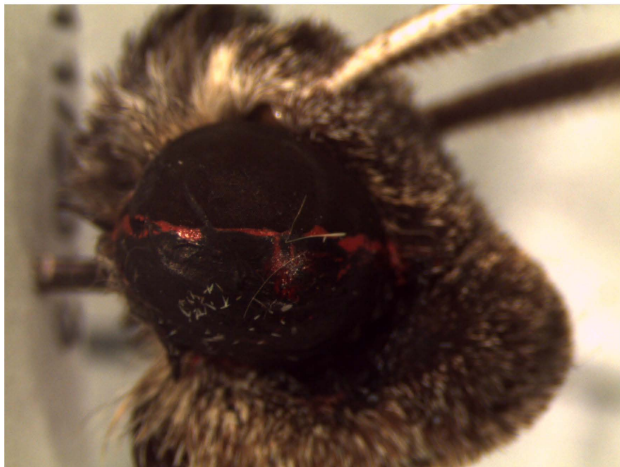

Ventral

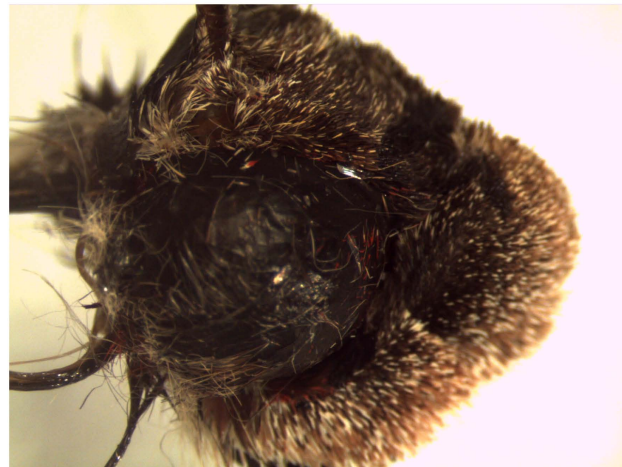

Negative

**Fig. S1.** Photographs of painted moths. The control photograph shows the anterior (A) - posterior (P) axis, and the dorsal (D) - ventral (V) axis. The dorsal-ventral axis was determined by pitching the moth up at  $35^\circ$ , the pitch angle of a plume tracking *M. sexta*, and drawing the equator of the eye at this angle.
